# Supplementary material for: Aggregation behaviour of betablocker drugs in aqueous media
Source: Royal Society of Chemistry journal article supplement (doi:10.1039/c4nj00112e), 2014-05-16
Supplement: c4nj00112e1.pdf [file c4nj00112e1.pdf]

## SUPPLEMENTARY MATERIAL

**Title:** Aggregation behaviour of betablockers drugs in aqueous media

Authors: Estefania Zuriaga, Laura Lomba, Félix M. Royo, Carlos Lafuente, Beatriz Giner

**Journal:** New Journal of Chemistry

**Date:** May 2014

### Table of contents

**Table 1.** Densities, speeds of sound, isentropic compressibilities, apparent molar volume, and apparent molar isentropic compressions of propranolol + water at  $T = 298.15$  K

**Table 2.** Densities, speeds of sound, isentropic compressibilities, apparent molar volume, and apparent molar isentropic compressions of atenolol + water at  $T = 298.15$  K

**Table 3.** Densities, speeds of sound, isentropic compressibilities, apparent molar volume, and apparent molar isentropic compressions of nadolol + water at  $T = 298.15$  K

**Table 4.** Densities, speeds of sound, isentropic compressibilities, apparent molar volume, and apparent molar isentropic compressions of metoprolol + water at  $T = 298.15$  K

**Table 5.** Densities, speeds of sound, isentropic compressibilities, apparent molar volume, and apparent molar isentropic compressions of timolol + water at  $T = 298.15$  K

**Table 6.** Densities, speeds of sound, isentropic compressibilities, apparent molar volume, and apparent molar isentropic compressions of acebutolol + water at  $T = 298.15$  K

**Table 7.** Conductivities of propranolol + water at  $T = 298.15$  K

**Table 8.** Conductivities of metoprolol + water at  $T = 298.15$  K

**Table 9.** Conductivities of timolol + water at  $T = 298.15$  K

**Table 10.** Conductivities of acebutolol + water at  $T = 298.15$  K

**Table 1.** Densities,  $\rho$ , speeds of sound,  $u$ , isentropic compressibilities,  $\kappa_s$ , apparent molar volume,  $V_\phi$ , and apparent molar isentropic compressions,  $K_{S,\phi}$ , of propranolol + water at  $T = 298.15$  K

| $m$<br>(mol·kg <sup>-1</sup> ) | $\rho$<br>(kg·m <sup>-3</sup> ) | $u$<br>(m·s <sup>-1</sup> ) | $\kappa_s$<br>(TPa <sup>-1</sup> ) | $10^6 \cdot V_\phi$<br>(m <sup>3</sup> ·mol <sup>-1</sup> ) | $K_{S,\phi}$<br>(TPa <sup>-1</sup> ·m <sup>3</sup> ·mol <sup>-1</sup> ) | $m$<br>(mol·kg <sup>-1</sup> ) | $\rho$<br>(g·cm <sup>-3</sup> ) | $u$<br>(m·s <sup>-1</sup> ) | $\kappa_s$<br>(TPa <sup>-1</sup> ) | $10^6 \cdot V_\phi$<br>(m <sup>3</sup> ·mol <sup>-1</sup> ) | $K_{S,\phi}$<br>(TPa <sup>-1</sup> ·m <sup>3</sup> ·mol <sup>-1</sup> ) |
|--------------------------------|---------------------------------|-----------------------------|------------------------------------|-------------------------------------------------------------|-------------------------------------------------------------------------|--------------------------------|---------------------------------|-----------------------------|------------------------------------|-------------------------------------------------------------|-------------------------------------------------------------------------|
| 0.00093                        | 997.241                         | 1496.96                     | 447.52                             | 82.5030                                                     | -0.0331                                                                 | 0.03804                        | 999.113                         | 1503.43                     | 446.43                             | 241.4464                                                    | -0.0180                                                                 |
| 0.00104                        | 997.251                         | 1496.99                     | 447.51                             | 95.4793                                                     | -0.0415                                                                 | 0.04200                        | 999.306                         | 1504.4                      | 445.99                             | 241.9372                                                    | -0.0168                                                                 |
| 0.00116                        | 997.261                         | 1497.02                     | 447.51                             | 107.6164                                                    | -0.0468                                                                 | 0.04519                        | 999.472                         | 1504.62                     | 441.95                             | 242.0275                                                    | -0.0173                                                                 |
| 0.00123                        | 997.267                         | 1497.03                     | 447.50                             | 113.4662                                                    | -0.0458                                                                 | 0.04983                        | 999.702                         | 1505.30                     | 441.45                             | 242.3625                                                    | -0.0158                                                                 |
| 0.00135                        | 997.274                         | 1497.05                     | 447.50                             | 124.5309                                                    | -0.0435                                                                 | 0.05371                        | 999.901                         | 1506.04                     | 440.93                             | 242.4645                                                    | -0.0167                                                                 |
| 0.00149                        | 997.281                         | 1497.07                     | 447.49                             | 135.9744                                                    | -0.0392                                                                 | 0.05942                        | 1000.181                        | 1506.88                     | 440.32                             | 242.7989                                                    | -0.0152                                                                 |
| 0.00160                        | 997.286                         | 1497.09                     | 447.49                             | 143.8751                                                    | -0.0377                                                                 | 0.06250                        | 1000.326                        | 1507.67                     | 439.79                             | 243.0470                                                    | -0.0176                                                                 |
| 0.00175                        | 997.292                         | 1497.11                     | 447.49                             | 153.5180                                                    | -0.0330                                                                 | 0.06974                        | 1000.693                        | 1508.94                     | 438.89                             | 243.1490                                                    | -0.0178                                                                 |
| 0.00202                        | 997.298                         | 1497.13                     | 447.46                             | 169.6564                                                    | -0.0195                                                                 | 0.07675                        | 1001.042                        | 1509.79                     | 438.24                             | 243.2977                                                    | -0.0150                                                                 |
| 0.00239                        | 997.324                         | 1497.19                     | 447.47                             | 178.3654                                                    | -0.0208                                                                 | 0.08489                        | 1001.442                        | 1510.82                     | 437.47                             | 243.4852                                                    | -0.0126                                                                 |
| 0.00256                        | 997.333                         | 1497.25                     | 447.46                             | 182.6800                                                    | -0.0278                                                                 | 0.09470                        | 1001.908                        | 1512.28                     | 436.42                             | 243.8197                                                    | -0.0114                                                                 |
| 0.00303                        | 997.351                         | 1497.37                     | 447.43                             | 194.3733                                                    | -0.0320                                                                 | 0.10194                        | 1002.216                        | 1513.25                     | 435.73                             | 244.3724                                                    | -0.0098                                                                 |
| 0.00413                        | 997.414                         | 1497.53                     | 447.40                             | 206.2464                                                    | -0.0251                                                                 | 0.11123                        | 1002.741                        | 1514.57                     | 434.74                             | 243.7627                                                    | -0.0095                                                                 |
| 0.00726                        | 997.555                         | 1498.06                     | 447.36                             | 225.6291                                                    | -0.0184                                                                 | 0.11905                        | 1003.197                        | 1515.56                     | 433.98                             | 243.1867                                                    | -0.0088                                                                 |
| 0.01068                        | 997.738                         | 1498.67                     | 447.31                             | 231.0648                                                    | -0.0197                                                                 | 0.12626                        | 1003.505                        | 1516.38                     | 433.38                             | 243.6242                                                    | -0.0070                                                                 |
| 0.01273                        | 997.848                         | 1499.07                     | 447.27                             | 232.8872                                                    | -0.0218                                                                 | 0.13680                        | 1003.845                        | 1517.43                     | 432.63                             | 244.9983                                                    | -0.0034                                                                 |
| 0.01487                        | 997.954                         | 1499.44                     | 447.23                             | 234.8445                                                    | -0.0210                                                                 | 0.14472                        | 1004.093                        | 1518.22                     | 432.07                             | 245.9441                                                    | -0.0010                                                                 |
| 0.01789                        | 998.112                         | 1499.99                     | 447.14                             | 236.3249                                                    | -0.0215                                                                 | 0.15198                        | 1004.303                        | 1519.04                     | 431.52                             | 246.8367                                                    | 0.0007                                                                  |
| 0.02066                        | 998.246                         | 1500.45                     | 446.98                             | 237.8260                                                    | -0.0200                                                                 | 0.16155                        | 1004.513                        | 1519.82                     | 430.98                             | 248.3127                                                    | 0.0042                                                                  |

|         |         |         |        |          |         |         |          |         |        |          |        |
|---------|---------|---------|--------|----------|---------|---------|----------|---------|--------|----------|--------|
| 0.03019 | 998.731 | 1502.15 | 447.05 | 240.0362 | -0.0202 | 0.16978 | 1004.741 | 1520.52 | 430.49 | 249.1533 | 0.0065 |
| 0.03432 | 998.928 | 1502.71 | 446.72 | 240.9812 | -0.0169 |         |          |         |        |          |        |

**Table 2.** Densities,  $\rho$ , speeds of sound,  $u$ , isentropic compressibilities,  $\kappa_s$ , apparent molar volume,  $V_\phi$ , and apparent molar isentropic compressions,  $K_{S,\phi}$ , of atenolol + water at  $T = 298.15$  K

| $m$<br>(mol·kg <sup>-1</sup> ) | $\rho$<br>(kg·m <sup>-3</sup> ) | $u$<br>(m·s <sup>-1</sup> ) | $\kappa_s$<br>(TPa <sup>-1</sup> ) | $10^6 \cdot V_\phi$<br>(m <sup>3</sup> ·mol <sup>-1</sup> ) | $K_{S,\phi}$<br>(TPa <sup>-1</sup> ·m <sup>3</sup> ·mol <sup>-1</sup> ) | $m$<br>(mol·kg <sup>-1</sup> ) | $\rho$<br>(g·cm <sup>-3</sup> ) | $u$<br>(m·s <sup>-1</sup> ) | $\kappa_s$<br>(TPa <sup>-1</sup> ) | $10^6 \cdot V_\phi$<br>(m <sup>3</sup> ·mol <sup>-1</sup> ) | $K_{S,\phi}$<br>(TPa <sup>-1</sup> ·m <sup>3</sup> ·mol <sup>-1</sup> ) |
|--------------------------------|---------------------------------|-----------------------------|------------------------------------|-------------------------------------------------------------|-------------------------------------------------------------------------|--------------------------------|---------------------------------|-----------------------------|------------------------------------|-------------------------------------------------------------|-------------------------------------------------------------------------|
| 0.00105                        | 997.245                         | 1496.91                     | 447.52                             | 73.5511                                                     | -0.0023                                                                 | 0.00583                        | 997.438                         | 1497.66                     | 446.98                             | 198.8555                                                    | -0.0094                                                                 |
| 0.00107                        | 997.246                         | 1496.91                     | 447.51                             | 76.2276                                                     | -0.0008                                                                 | 0.00533                        | 997.419                         | 1497.56                     | 447.05                             | 196.0527                                                    | -0.0071                                                                 |
| 0.00111                        | 997.248                         | 1496.92                     | 447.51                             | 81.2913                                                     | -0.0035                                                                 | 0.00862                        | 997.559                         | 1498.01                     | 446.72                             | 206.7664                                                    | -0.0047                                                                 |
| 0.00115                        | 997.249                         | 1496.93                     | 447.50                             | 86.8773                                                     | -0.0053                                                                 | 0.01126                        | 997.654                         | 1498.42                     | 446.43                             | 212.3744                                                    | -0.0051                                                                 |
| 0.00117                        | 997.250                         | 1496.93                     | 447.50                             | 89.0972                                                     | -0.0039                                                                 | 0.01469                        | 997.851                         | 1499.01                     | 445.99                             | 211.5882                                                    | -0.0122                                                                 |
| 0.00123                        | 997.253                         | 1496.94                     | 447.49                             | 95.3238                                                     | -0.0049                                                                 | 0.02060                        | 998.030                         | 1499.80                     | 445.44                             | 218.6761                                                    | -0.0053                                                                 |
| 0.00125                        | 997.254                         | 1496.94                     | 447.49                             | 97.2665                                                     | -0.0037                                                                 | 0.02555                        | 998.196                         | 1500.12                     | 445.18                             | 221.4384                                                    | 0.0054                                                                  |
| 0.00129                        | 997.255                         | 1496.95                     | 447.49                             | 101.7508                                                    | -0.0052                                                                 | 0.03015                        | 998.312                         | 1500.91                     | 444.66                             | 224.4645                                                    | 0.0035                                                                  |
| 0.00136                        | 997.257                         | 1496.99                     | 447.46                             | 108.7788                                                    | -0.0177                                                                 | 0.03577                        | 998.594                         | 1501.87                     | 443.96                             | 223.1248                                                    | -0.0016                                                                 |
| 0.00144                        | 997.260                         | 1496.97                     | 447.47                             | 115.4750                                                    | -0.0037                                                                 | 0.03981                        | 998.813                         | 1502.63                     | 443.42                             | 221.9704                                                    | -0.0057                                                                 |
| 0.00159                        | 997.266                         | 1496.98                     | 447.46                             | 125.9769                                                    | 0.0008                                                                  | 0.04344                        | 999.002                         | 1503.31                     | 442.93                             | 221.2904                                                    | -0.0086                                                                 |
| 0.00170                        | 997.270                         | 1497.03                     | 447.43                             | 132.7369                                                    | -0.0113                                                                 | 0.04636                        | 999.136                         | 1503.92                     | 442.51                             | 221.2106                                                    | -0.0111                                                                 |
| 0.00199                        | 997.284                         | 1497.08                     | 447.40                             | 145.2297                                                    | -0.0136                                                                 | 0.05043                        | 999.291                         | 1504.42                     | 442.15                             | 221.7484                                                    | -0.0094                                                                 |
| 0.00248                        | 997.303                         | 1497.13                     | 447.36                             | 161.5862                                                    | -0.0063                                                                 | 0.05115                        | 999.331                         | 1504.52                     | 442.07                             | 221.5844                                                    | -0.0094                                                                 |
| 0.00283                        | 997.318                         | 1497.19                     | 447.31                             | 169.2927                                                    | -0.0083                                                                 | 0.05780                        | 999.508                         | 1505.29                     | 441.54                             | 223.6365                                                    | -0.0055                                                                 |
| 0.00316                        | 997.331                         | 1497.25                     | 447.27                             | 175.3585                                                    | -0.0100                                                                 | 0.06061                        | 999.585                         | 1505.51                     | 441.38                             | 224.3284                                                    | -0.0031                                                                 |
| 0.00358                        | 997.349                         | 1497.31                     | 447.23                             | 181.0516                                                    | -0.0094                                                                 | 0.06757                        | 999.731                         | 1506.17                     | 440.93                             | 226.4620                                                    | 0.0016                                                                  |
| 0.00433                        | 997.376                         | 1497.44                     | 447.14                             | 189.6643                                                    | -0.0107                                                                 | 0.07283                        | 999.815                         | 1506.54                     | 440.68                             | 228.1681                                                    | 0.0059                                                                  |

**Table 3.** Densities,  $\rho$ , speeds of sound,  $u$ , isentropic compressibilities,  $\kappa_s$ , apparent molar volume,  $V_\phi$ , and apparent molar isentropic compressions,  $K_{S,\phi}$ , of nadolol + water at  $T = 298.15$  K

| $m$<br>(mol·kg <sup>-1</sup> ) | $\rho$<br>(kg·m <sup>-3</sup> ) | $u$<br>(m·s <sup>-1</sup> ) | $\kappa_s$<br>(TPa <sup>-1</sup> ) | $10^6 \cdot V_\phi$<br>(m <sup>3</sup> ·mol <sup>-1</sup> ) | $K_{S,\phi}$<br>(TPa <sup>-1</sup> ·m <sup>3</sup> ·mol <sup>-1</sup> ) | $m$<br>(mol·kg <sup>-1</sup> ) | $\rho$<br>(g·cm <sup>-3</sup> ) | $u$<br>(m·s <sup>-1</sup> ) | $\kappa_s$<br>(TPa <sup>-1</sup> ) | $10^6 \cdot V_\phi$<br>(m <sup>3</sup> ·mol <sup>-1</sup> ) | $K_{S,\phi}$<br>(TPa <sup>-1</sup> ·m <sup>3</sup> ·mol <sup>-1</sup> ) |
|--------------------------------|---------------------------------|-----------------------------|------------------------------------|-------------------------------------------------------------|-------------------------------------------------------------------------|--------------------------------|---------------------------------|-----------------------------|------------------------------------|-------------------------------------------------------------|-------------------------------------------------------------------------|
| 0.00091                        | 997.254                         | 1496.95                     | 447.49                             | 77.0558                                                     | -0.0369                                                                 | 0.00477                        | 997.452                         | 1497.64                     | 446.99                             | 223.9721                                                    | -0.0189                                                                 |
| 0.00099                        | 997.260                         | 1496.96                     | 447.48                             | 89.8041                                                     | -0.0342                                                                 | 0.00519                        | 997.475                         | 1497.71                     | 446.93                             | 226.4880                                                    | -0.0182                                                                 |
| 0.00107                        | 997.265                         | 1496.97                     | 447.47                             | 101.5859                                                    | -0.0311                                                                 | 0.00617                        | 997.522                         | 1497.87                     | 446.82                             | 232.1112                                                    | -0.0157                                                                 |
| 0.00117                        | 997.270                         | 1496.98                     | 447.46                             | 115.1218                                                    | -0.0256                                                                 | 0.00732                        | 997.581                         | 1498.06                     | 446.68                             | 236.2563                                                    | -0.0142                                                                 |
| 0.00119                        | 997.271                         | 1496.98                     | 447.46                             | 117.5559                                                    | -0.0236                                                                 | 0.00895                        | 997.652                         | 1498.29                     | 446.51                             | 241.7211                                                    | -0.0090                                                                 |
| 0.00126                        | 997.274                         | 1496.99                     | 447.45                             | 125.8661                                                    | -0.0214                                                                 | 0.00990                        | 997.697                         | 1498.42                     | 446.41                             | 243.7047                                                    | -0.0068                                                                 |
| 0.00144                        | 997.281                         | 1497.01                     | 447.44                             | 144.0236                                                    | -0.0141                                                                 | 0.01222                        | 997.827                         | 1498.58                     | 446.26                             | 245.5863                                                    | 0.0034                                                                  |
| 0.00162                        | 997.292                         | 1497.04                     | 447.42                             | 155.6620                                                    | -0.0143                                                                 | 0.01412                        | 997.862                         | 1498.79                     | 446.12                             | 251.7634                                                    | 0.0104                                                                  |
| 0.00179                        | 997.305                         | 1497.09                     | 447.38                             | 163.0366                                                    | -0.0231                                                                 | 0.01597                        | 998.003                         | 1499.07                     | 445.89                             | 249.6075                                                    | 0.0068                                                                  |
| 0.00205                        | 997.318                         | 1497.13                     | 447.35                             | 175.3260                                                    | -0.0200                                                                 | 0.01920                        | 998.155                         | 1499.57                     | 445.52                             | 251.7761                                                    | 0.0061                                                                  |
| 0.00228                        | 997.331                         | 1497.18                     | 447.31                             | 183.1985                                                    | -0.0222                                                                 | 0.01955                        | 998.168                         | 1499.59                     | 445.50                             | 252.1465                                                    | 0.0073                                                                  |
| 0.00264                        | 997.351                         | 1497.23                     | 447.28                             | 192.8983                                                    | -0.0184                                                                 | 0.02374                        | 998.331                         | 1500.16                     | 445.09                             | 255.4110                                                    | 0.0098                                                                  |
| 0.00333                        | 997.384                         | 1497.36                     | 447.18                             | 207.2360                                                    | -0.0182                                                                 | 0.02614                        | 998.395                         | 1500.29                     | 444.99                             | 257.9391                                                    | 0.0164                                                                  |
| 0.00346                        | 997.391                         | 1497.39                     | 447.16                             | 209.0691                                                    | -0.0193                                                                 | 0.03535                        | 998.560                         | 1500.87                     | 444.57                             | 266.7431                                                    | 0.0340                                                                  |
| 0.00396                        | 997.411                         | 1497.49                     | 447.09                             | 216.7563                                                    | -0.0191                                                                 | 0.04579                        | 998.699                         | 1501.33                     | 444.24                             | 273.4834                                                    | 0.0489                                                                  |
| 0.00420                        | 997.423                         | 1497.53                     | 447.06                             | 219.2204                                                    | -0.0183                                                                 |                                |                                 |                             |                                    |                                                             |                                                                         |

**Table 4.** Densities,  $\rho$ , speeds of sound,  $u$ , isentropic compressibilities,  $\kappa_s$ , apparent molar volume,  $V_\phi$ , and apparent molar isentropic compressions,  $K_{S,\phi}$ , of metoprolol + water at  $T = 298.15$  K

| $m$<br>(mol·kg <sup>-1</sup> ) | $\rho$<br>(kg·m <sup>-3</sup> ) | $u$<br>(m·s <sup>-1</sup> ) | $\kappa_s$<br>(TPa <sup>-1</sup> ) | $10^6 \cdot V_\phi$<br>(m <sup>3</sup> ·mol <sup>-1</sup> ) | $K_{S,\phi}$<br>(TPa <sup>-1</sup> ·m <sup>3</sup> ·mol <sup>-1</sup> ) | $m$<br>(mol·kg <sup>-1</sup> ) | $\rho$<br>(g·cm <sup>-3</sup> ) | $u$<br>(m·s <sup>-1</sup> ) | $\kappa_s$<br>(TPa <sup>-1</sup> ) | $10^6 \cdot V_\phi$<br>(m <sup>3</sup> ·mol <sup>-1</sup> ) | $K_{S,\phi}$<br>(TPa <sup>-1</sup> ·m <sup>3</sup> ·mol <sup>-1</sup> ) |
|--------------------------------|---------------------------------|-----------------------------|------------------------------------|-------------------------------------------------------------|-------------------------------------------------------------------------|--------------------------------|---------------------------------|-----------------------------|------------------------------------|-------------------------------------------------------------|-------------------------------------------------------------------------|
| 0.00108                        | 997.258                         | 1496.80                     | 447.57                             | 486.4794                                                    | 0.2392                                                                  | 0.00803                        | 998.319                         | 1500.17                     | 445.09                             | 526.3194                                                    | -0.0729                                                                 |
| 0.00121                        | 997.311                         | 1497.00                     | 447.43                             | 463.9130                                                    | 0.1079                                                                  | 0.01253                        | 998.955                         | 1502.00                     | 443.73                             | 532.3199                                                    | -0.0700                                                                 |
| 0.00141                        | 997.376                         | 1497.19                     | 447.29                             | 449.1178                                                    | 0.0138                                                                  | 0.01255                        | 998.958                         | 1502.01                     | 443.72                             | 532.3225                                                    | -0.0701                                                                 |
| 0.00151                        | 997.401                         | 1497.32                     | 447.20                             | 448.1856                                                    | -0.0333                                                                 | 0.02187                        | 1000.234                        | 1505.77                     | 440.94                             | 538.3437                                                    | -0.0657                                                                 |
| 0.00176                        | 997.445                         | 1497.48                     | 447.08                             | 456.8909                                                    | -0.0619                                                                 | 0.03105                        | 1001.372                        | 1509.12                     | 438.49                             | 544.2295                                                    | -0.0541                                                                 |
| 0.00191                        | 997.473                         | 1497.58                     | 447.01                             | 460.1743                                                    | -0.0775                                                                 | 0.05086                        | 1004.045                        | 1517.09                     | 432.74                             | 544.5270                                                    | -0.0565                                                                 |
| 0.00201                        | 997.489                         | 1497.63                     | 446.97                             | 463.4250                                                    | -0.0805                                                                 | 0.07310                        | 1006.839                        | 1525.30                     | 426.90                             | 546.6657                                                    | -0.0499                                                                 |
| 0.00221                        | 997.513                         | 1497.72                     | 446.91                             | 472.6852                                                    | -0.0796                                                                 | 0.10173                        | 1010.460                        | 1535.32                     | 419.84                             | 546.8109                                                    | -0.0436                                                                 |
| 0.00244                        | 997.535                         | 1497.80                     | 446.85                             | 483.7651                                                    | -0.0709                                                                 | 0.11455                        | 1012.078                        | 1539.19                     | 417.06                             | 546.5666                                                    | -0.0390                                                                 |
| 0.00242                        | 997.535                         | 1497.80                     | 446.85                             | 482.0896                                                    | -0.0741                                                                 | 0.13774                        | 1015.361                        | 1547.25                     | 411.39                             | 543.0836                                                    | -0.0399                                                                 |
| 0.00300                        | 997.618                         | 1498.03                     | 446.68                             | 493.7510                                                    | -0.0713                                                                 | 0.14948                        | 1016.985                        | 1551.18                     | 408.66                             | 541.8027                                                    | -0.0395                                                                 |
| 0.00363                        | 997.709                         | 1498.35                     | 446.45                             | 501.9447                                                    | -0.0810                                                                 | 0.16722                        | 1018.819                        | 1556.31                     | 405.24                             | 543.9633                                                    | -0.0334                                                                 |
| 0.00467                        | 997.853                         | 1498.70                     | 446.17                             | 511.9472                                                    | -0.0674                                                                 | 0.19231                        | 1021.055                        | 1563.62                     | 400.58                             | 548.0398                                                    | -0.0254                                                                 |
| 0.00626                        | 998.081                         | 1499.39                     | 445.66                             | 519.5005                                                    | -0.0712                                                                 | 0.22831                        | 1023.168                        | 1570.50                     | 396.26                             | 557.1352                                                    | -0.0046                                                                 |

**Table 5.** Densities,  $\rho$ , speeds of sound,  $u$ , isentropic compressibilities,  $\kappa_s$ , apparent molar volume,  $V_\phi$ , and apparent molar isentropic compressions,  $K_{S,\phi}$ , of timolol + water at  $T = 298.15$  K

| $m$<br>(mol·kg <sup>-1</sup> ) | $\rho$<br>(kg·m <sup>-3</sup> ) | $u$<br>(m·s <sup>-1</sup> ) | $\kappa_s$<br>(TPa <sup>-1</sup> ) | $10^6 \cdot V_\phi$<br>(m <sup>3</sup> ·mol <sup>-1</sup> ) | $K_{S,\phi}$<br>(TPa <sup>-1</sup> ·m <sup>3</sup> ·mol <sup>-1</sup> ) | $m$<br>(mol·kg <sup>-1</sup> ) | $\rho$<br>(g·cm <sup>-3</sup> ) | $u$<br>(m·s <sup>-1</sup> ) | $\kappa_s$<br>(TPa <sup>-1</sup> ) | $10^6 \cdot V_\phi$<br>(m <sup>3</sup> ·mol <sup>-1</sup> ) | $K_{S,\phi}$<br>(TPa <sup>-1</sup> ·m <sup>3</sup> ·mol <sup>-1</sup> ) |
|--------------------------------|---------------------------------|-----------------------------|------------------------------------|-------------------------------------------------------------|-------------------------------------------------------------------------|--------------------------------|---------------------------------|-----------------------------|------------------------------------|-------------------------------------------------------------|-------------------------------------------------------------------------|
| 0.00098                        | 997.304                         | 1496.90                     | 447.49                             | 165.8307                                                    | 0.0155                                                                  | 0.01047                        | 998.346                         | 1498.53                     | 446.05                             | 308.1898                                                    | -0.0059                                                                 |
| 0.00096                        | 997.298                         | 1496.89                     | 447.50                             | 166.5372                                                    | 0.0237                                                                  | 0.01126                        | 998.432                         | 1498.69                     | 445.92                             | 309.2621                                                    | -0.0073                                                                 |
| 0.00112                        | 997.324                         | 1496.95                     | 447.45                             | 181.3483                                                    | -0.0050                                                                 | 0.01765                        | 999.132                         | 1499.71                     | 445.00                             | 314.0646                                                    | -0.0051                                                                 |
| 0.00130                        | 997.339                         | 1497.00                     | 447.42                             | 204.6771                                                    | -0.0109                                                                 | 0.01772                        | 999.134                         | 1499.73                     | 444.99                             | 314.4201                                                    | -0.0050                                                                 |
| 0.00165                        | 997.378                         | 1497.05                     | 447.37                             | 229.4692                                                    | -0.0069                                                                 | 0.02013                        | 999.400                         | 1500.12                     | 444.64                             | 315.2530                                                    | -0.0049                                                                 |
| 0.00221                        | 997.438                         | 1497.14                     | 447.29                             | 253.8873                                                    | -0.0048                                                                 | 0.02203                        | 999.606                         | 1500.49                     | 444.33                             | 315.9381                                                    | -0.0063                                                                 |
| 0.00314                        | 997.536                         | 1497.28                     | 447.16                             | 275.7073                                                    | -0.0008                                                                 | 0.02415                        | 999.827                         | 1500.81                     | 444.04                             | 316.9334                                                    | -0.0050                                                                 |
| 0.00323                        | 997.551                         | 1497.29                     | 447.15                             | 275.4325                                                    | -0.0014                                                                 | 0.03259                        | 1000.742                        | 1502.18                     | 442.83                             | 318.4260                                                    | -0.0044                                                                 |
| 0.00386                        | 997.632                         | 1497.37                     | 447.07                             | 280.1201                                                    | -0.0009                                                                 | 0.03683                        | 1001.202                        | 1502.84                     | 442.23                             | 318.8576                                                    | -0.0038                                                                 |
| 0.00408                        | 997.646                         | 1497.48                     | 446.99                             | 284.9383                                                    | -0.0096                                                                 | 0.04029                        | 1001.560                        | 1503.45                     | 441.72                             | 319.5568                                                    | -0.0041                                                                 |
| 0.00428                        | 997.667                         | 1497.50                     | 446.97                             | 286.9427                                                    | -0.0073                                                                 | 0.04634                        | 1002.221                        | 1504.39                     | 440.88                             | 319.7192                                                    | -0.0035                                                                 |
| 0.00463                        | 997.683                         | 1497.49                     | 446.97                             | 294.5436                                                    | 0.0061                                                                  | 0.05025                        | 1002.626                        | 1505.03                     | 440.32                             | 320.2251                                                    | -0.0033                                                                 |
| 0.00545                        | 997.800                         | 1497.69                     | 446.80                             | 293.8354                                                    | -0.0070                                                                 | 0.06680                        | 1004.366                        | 1507.51                     | 438.11                             | 321.1470                                                    | -0.0010                                                                 |
| 0.00553                        | 997.806                         | 1497.71                     | 446.78                             | 294.7628                                                    | -0.0073                                                                 | 0.06743                        | 1004.437                        | 1507.62                     | 438.02                             | 321.0956                                                    | -0.0011                                                                 |
| 0.00640                        | 997.907                         | 1497.84                     | 446.66                             | 297.7228                                                    | -0.0063                                                                 | 0.08117                        | 1005.856                        | 1509.71                     | 436.19                             | 321.7194                                                    | 0.0000                                                                  |
| 0.00782                        | 998.052                         | 1498.07                     | 446.46                             | 303.6808                                                    | -0.0043                                                                 | 0.09488                        | 1007.290                        | 1511.79                     | 434.37                             | 321.8340                                                    | 0.0005                                                                  |
| 0.00881                        | 998.161                         | 1498.28                     | 446.29                             | 305.7847                                                    | -0.0075                                                                 | 0.10953                        | 1008.784                        | 1513.82                     | 432.57                             | 322.1579                                                    | 0.0021                                                                  |

**Table 6.** Densities,  $\rho$ , speeds of sound,  $u$ , isentropic compressibilities,  $\kappa_s$ , apparent molar volume,  $V_\phi$ , and apparent molar isentropic compressions,  $K_{S,\phi}$ , of acebutolol + water at  $T = 298.15$  K

| $m$<br>(mol·kg <sup>-1</sup> ) | $\rho$<br>(kg·m <sup>-3</sup> ) | $u$<br>(m·s <sup>-1</sup> ) | $\kappa_s$<br>(TPa <sup>-1</sup> ) | $10^6 \cdot V_\phi$<br>(m <sup>3</sup> ·mol <sup>-1</sup> ) | $K_{S,\phi}$<br>(TPa <sup>-1</sup> ·m <sup>3</sup> ·mol <sup>-1</sup> ) | $m$<br>(mol·kg <sup>-1</sup> ) | $\rho$<br>(g·cm <sup>-3</sup> ) | $u$<br>(m·s <sup>-1</sup> ) | $\kappa_s$<br>(TPa <sup>-1</sup> ) | $10^6 \cdot V_\phi$<br>(m <sup>3</sup> ·mol <sup>-1</sup> ) | $K_{S,\phi}$<br>(TPa <sup>-1</sup> ·m <sup>3</sup> ·mol <sup>-1</sup> ) |
|--------------------------------|---------------------------------|-----------------------------|------------------------------------|-------------------------------------------------------------|-------------------------------------------------------------------------|--------------------------------|---------------------------------|-----------------------------|------------------------------------|-------------------------------------------------------------|-------------------------------------------------------------------------|
| 0.00097                        | 997.259                         | 1496.91                     | 447.51                             | 149.9602                                                    | 0.0225                                                                  | 0.00752                        | 997.701                         | 1498.31                     | 446.47                             | 285.7875                                                    | -0.0160                                                                 |
| 0.00105                        | 997.267                         | 1496.93                     | 447.49                             | 159.3595                                                    | 0.0153                                                                  | 0.00930                        | 997.817                         | 1498.67                     | 446.21                             | 290.0505                                                    | -0.0154                                                                 |
| 0.00110                        | 997.274                         | 1496.96                     | 447.47                             | 162.7107                                                    | 0.0001                                                                  | 0.01322                        | 998.071                         | 1499.44                     | 445.64                             | 295.4684                                                    | -0.0136                                                                 |
| 0.00125                        | 997.285                         | 1497.00                     | 447.44                             | 179.2024                                                    | -0.0070                                                                 | 0.02065                        | 998.564                         | 1500.95                     | 444.52                             | 299.4454                                                    | -0.0141                                                                 |
| 0.00135                        | 997.292                         | 1497.02                     | 447.43                             | 188.4087                                                    | -0.0076                                                                 | 0.02788                        | 999.041                         | 1502.42                     | 443.44                             | 301.3021                                                    | -0.0143                                                                 |
| 0.00159                        | 997.308                         | 1497.06                     | 447.40                             | 206.2844                                                    | -0.0053                                                                 | 0.03418                        | 999.450                         | 1503.66                     | 442.53                             | 302.4262                                                    | -0.0136                                                                 |
| 0.00181                        | 997.322                         | 1497.13                     | 447.35                             | 218.8753                                                    | -0.0145                                                                 | 0.04114                        | 999.905                         | 1505.01                     | 441.53                             | 303.1451                                                    | -0.0129                                                                 |
| 0.00219                        | 997.345                         | 1497.21                     | 447.29                             | 235.2060                                                    | -0.0143                                                                 | 0.05168                        | 1000.593                        | 1507.05                     | 440.03                             | 303.8142                                                    | -0.0122                                                                 |
| 0.00250                        | 997.365                         | 1497.27                     | 447.25                             | 244.3519                                                    | -0.0134                                                                 | 0.05787                        | 1001.001                        | 1508.21                     | 439.18                             | 303.9882                                                    | -0.0116                                                                 |
| 0.00301                        | 997.402                         | 1497.37                     | 447.17                             | 253.9269                                                    | -0.0138                                                                 | 0.06527                        | 1001.477                        | 1509.57                     | 438.18                             | 304.3059                                                    | -0.0107                                                                 |
| 0.00375                        | 997.450                         | 1497.54                     | 447.05                             | 264.7098                                                    | -0.0168                                                                 | 0.08217                        | 1002.581                        | 1512.73                     | 435.87                             | 304.5073                                                    | -0.0098                                                                 |
| 0.00540                        | 997.559                         | 1497.83                     | 446.82                             | 277.7290                                                    | -0.0110                                                                 | 0.08749                        | 1002.919                        | 1513.70                     | 435.17                             | 304.6396                                                    | -0.0094                                                                 |
| 0.00613                        | 997.608                         | 1497.99                     | 446.71                             | 281.1194                                                    | -0.0126                                                                 | 0.10428                        | 1003.605                        | 1515.91                     | 433.60                             | 308.6639                                                    | -0.0003                                                                 |

**Table 7.** Conductivities,  $\kappa$ , of propanolol + water at  $T = 298.15$  K

| $m$<br>(mol·kg <sup>-1</sup> ) | $\kappa$<br>(mS·cm <sup>-1</sup> ) | $m$<br>(mol·kg <sup>-1</sup> ) | $\kappa$<br>(mS·cm <sup>-1</sup> ) |
|--------------------------------|------------------------------------|--------------------------------|------------------------------------|
| 0.00075                        | 0.168                              | 0.02617                        | 2.470                              |
| 0.00095                        | 0.205                              | 0.03203                        | 2.830                              |
| 0.00117                        | 0.240                              | 0.04056                        | 3.360                              |
| 0.00147                        | 0.288                              | 0.04922                        | 3.920                              |
| 0.00239                        | 0.425                              | 0.05941                        | 4.550                              |
| 0.00387                        | 0.613                              | 0.07282                        | 5.590                              |
| 0.00590                        | 0.827                              | 0.08577                        | 6.160                              |
| 0.00835                        | 1.066                              | 0.10600                        | 7.120                              |
| 0.01287                        | 1.456                              | 0.13568                        | 8.180                              |
| 0.01853                        | 1.930                              | 0.16683                        | 9.010                              |
| 0.02056                        | 2.070                              |                                |                                    |



**Table 8.** Conductivities,  $\kappa$ , of metoprolol + water at  $T = 298.15$  K

| $m$<br>(mol·kg <sup>-1</sup> ) | $\kappa$<br>(mS·cm <sup>-1</sup> ) | $m$<br>(mol·kg <sup>-1</sup> ) | $\kappa$<br>(mS·cm <sup>-1</sup> ) |
|--------------------------------|------------------------------------|--------------------------------|------------------------------------|
| 0.00064                        | 0.163                              | 0.03090                        | 3.200                              |
| 0.00083                        | 0.210                              | 0.04460                        | 4.150                              |
| 0.00105                        | 0.250                              | 0.06240                        | 5.280                              |
| 0.00149                        | 0.325                              | 0.07940                        | 6.250                              |
| 0.00243                        | 0.483                              | 0.09680                        | 7.150                              |
| 0.00317                        | 0.603                              | 0.11408                        | 7.960                              |
| 0.00524                        | 0.891                              | 0.12640                        | 8.440                              |
| 0.00763                        | 1.154                              | 0.13330                        | 8.710                              |
| 0.00998                        | 1.421                              | 0.14520                        | 9.130                              |
| 0.01520                        | 1.940                              | 0.17060                        | 9.850                              |
| 0.02000                        | 2.360                              |                                |                                    |

**Table 9.** Conductivities,  $\kappa$ , of timolol + water at  $T = 298.15$  K

| $m$<br>(mol·kg <sup>-1</sup> ) | $\kappa$<br>(mS·cm <sup>-1</sup> ) | $m$<br>(mol·kg <sup>-1</sup> ) | $\kappa$<br>(mS·cm <sup>-1</sup> ) |
|--------------------------------|------------------------------------|--------------------------------|------------------------------------|
| 0.00098                        | 0.103                              | 0.01973                        | 1.016                              |
| 0.00111                        | 0.119                              | 0.02360                        | 1.180                              |
| 0.00133                        | 0.149                              | 0.02973                        | 1.387                              |
| 0.00172                        | 0.162                              | 0.03412                        | 1.540                              |
| 0.00253                        | 0.230                              | 0.03758                        | 1.689                              |
| 0.00348                        | 0.275                              | 0.04602                        | 1.947                              |
| 0.00532                        | 0.392                              | 0.05068                        | 2.090                              |
| 0.00737                        | 0.492                              | 0.05748                        | 2.290                              |
| 0.00955                        | 0.600                              | 0.06188                        | 2.400                              |
| 0.01122                        | 0.680                              | 0.07217                        | 2.650                              |
| 0.01356                        | 0.770                              | 0.07878                        | 2.840                              |
| 0.01657                        | 0.908                              |                                |                                    |

**Table 10.** Conductivities,  $\kappa$ , of acebutolol + water at  $T = 298.15$  K

| $m$<br>(mol·kg <sup>-1</sup> ) | $\kappa$<br>(mS·cm <sup>-1</sup> ) | $m$<br>(mol·kg <sup>-1</sup> ) | $\kappa$<br>(mS·cm <sup>-1</sup> ) |
|--------------------------------|------------------------------------|--------------------------------|------------------------------------|
| 0.00061                        | 0.175                              | 0.02600                        | 2.330                              |
| 0.00086                        | 0.212                              | 0.02952                        | 2.550                              |
| 0.00095                        | 0.222                              | 0.03266                        | 2.740                              |
| 0.00132                        | 0.289                              | 0.03600                        | 2.960                              |
| 0.00177                        | 0.370                              | 0.03967                        | 3.190                              |
| 0.00285                        | 0.508                              | 0.04510                        | 3.420                              |
| 0.00471                        | 0.748                              | 0.05030                        | 3.710                              |
| 0.00774                        | 1.016                              | 0.05730                        | 4.080                              |
| 0.01177                        | 1.336                              | 0.06636                        | 4.480                              |
| 0.01584                        | 1.621                              | 0.08140                        | 5.310                              |
| 0.02039                        | 1.957                              | 0.10660                        | 6.170                              |
